# Supplementary material
Source: PubMed Central journal article supplement (PMC3911117)
Supplement: AEM.03640-13_zam999105069so1.pdf [file AEM.03640-13_zam999105069so1.pdf]

TABLE S1 Primers used in this study

| Primer name                 | Oligonucleotide sequence (5' → 3')          |
|-----------------------------|---------------------------------------------|
| Over-expression experiments |                                             |
| <i>pf279</i> -XbaI-F        | TATGCT <u>CTAGA</u> ATGCGACGTCGCAC          |
| <i>pf279</i> -HindIII-R     | TATGCA <u>AAGCTT</u> TTCACCGGGATTCCC        |
| <i>pf774</i> - XbaI- F      | GATCATT <u>CTAGAG</u> TGAGTCGGTCGGGACGG     |
| <i>pf774</i> - HindIII-R    | GATCATA <u>AAGCTT</u> TTCACGCCTCCGCAGAGCC   |
| Inactivation experiments    |                                             |
| KO- <i>pf279</i> - XbaI-F   | GATCTTT <u>CTAGA</u> AAGCCCTCGCTGCTGTCTTGA  |
| KO- <i>pf279</i> - BamHI-R  | GATCTT <u>GGATCC</u> CAGGAGTCGGACAGGCATTCCG |
| KO- <i>pf774</i> - XbaI-F   | GATCTTT <u>CTAGAG</u> GGTTGCGTTCCTGTTGCTGA  |
| KO- <i>pf774</i> - BamHI-R  | GATCTT <u>GGATCC</u> CAGCAGGTTTCGCGTCAAGGTT |

Underlined sequences indicate the position of restriction sites

FIG S1 ClustalW multiple sequence alignment of 61 to 240 bp of pf279 gene encoding a secreted esterase in 21 wild strains of *Propionibacterium freudenreichii*

|                    | 61                                                          | 120   |
|--------------------|-------------------------------------------------------------|-------|
| PFCIRM118_05600    | GCCCAGGCCGCACCCGCCAGTGCCGACGGGGGCACCAGTTCCACCCACGCAGCGTGGCG |       |
| PFCIRM123_09055    | GCCCAGGCCGCACCCGCCAGTGCCGACGGGGGCACCAGTTCCACCCACGCAGCGTGGCG |       |
| PFCIRM134_10180-   | GCCCAGGCCGCACCCGCCAGTGCCGACGGGGGCACCAGTTCCACCCACGCAGCGTGGCG |       |
| PFCIRM456_09555    | GCCCAGGCCGCACCCGCCAGTGCCGACGGGGGCACCAGTTCCACCCACGCAGCGTGGCG |       |
| PFCIRM508_01655    | GCCCAGGCCGCACCCGCCAGTGCCGACGGGGGCACCAGTTCCACCCACGCAGCGTGGCG |       |
| ITGP9_09195        | GCCCAGGCCGCACCCGCCAGTGCCGACGGGGGCACCAGTTCCACCCACGCAGCGTGGCG |       |
| PFCIRM9_06320      | GCCCAGGCCGCACCCGCCAGTGCCGACGGGGGCACCAGTTCCACCCACGCAGCGTGGCG |       |
| ITGP23_03080       | GCCCAGGCCGCACCCGCCAGTGCCGACGGGGGCACCAGTTCCACCCACGCAGCGTGGCG |       |
| PFCIRM527_10700    | GCCCAGGCCGCACCCGCCAGTGCCGACGGGGGCACCAGTTCCACCCACGCAGCGTGGCG |       |
| ITGP18_00520       | GCCCAGGCCGCACCCGCCAGTGCCGACGGGGGCACCAGTTCCACCCACGCAGCGTGGCG |       |
| CIRM1-PFREUD_04340 | GCCCAGGCCGCACCCGCCAGTGCCGACGGGGGCACCAGTTCCACCCACGCAGCGTGGCG |       |
| PFCIRM513_04955-   | GCCCAGGCCGCACCCGCCAGTGCCGACGGGGGCACCAGTTCCACCCACGCAGCGTGGCG |       |
| ITGP20_08925       | GCCCAGGCCGCACCCGCCAGTGCCGACGGGGGCACCAGTTCCACCCACGCAGCGTGGCG |       |
| PFCIRM512_02550    | GCCCAGGCCGCACCCGCCAGTGCCGACGGGGGCACCAGTTCCACCCACGCAGCGTGGCG |       |
| PFCIRM135_09305    | GCCCAGGCCGCACCCGCCAGTGCCGACGGGGGCACCAGTTCCACCCACGCAGCGTGGCG |       |
| PFCIRM122_07375    | GCCCAGGCCGCACCCGCCAGTGCCGACGGGGGCACCAGTTCCACCCACGCAGCGTGGCG |       |
| PFCIRM121_09415    | GCCCAGGCCGCACCCGCCAGTGCCGACGGGGGCACCAGTTCCACCCACGCAGCGTGGCG |       |
| PFCIRM119_12075    | GCCCAGGCCGCACCCGCCAGTGCCGACGGGGGCACCAGTTCCACCCACGCAGCGTGGCG |       |
| LSP108             | GCCCAGGCCGCACCCGCCAGTGCCGACGGGGGCACCAGTTCCACCCACGCAGCGTGGCG |       |
| CIRM514            | GCCCAGGCCGCACCCGCCAGTGCCGACGGGGGCACCAGTTCCACCCACGCAGCGTGGCG |       |
| PFCIRM516_06470    | GCCCAGGCCGCACCCGCCAGTGCCGACGGGGGCACCAGTTCCACCCACGCAGCGTGGCG |       |
| Clustal consensus  | *****                                                       | ***** |
|                    | 121                                                         | 180   |
| PFCIRM118_05600    | ACATCGACGTCGTCGCTGGCGTGGACCCGGCGTCGGCATGTGGCGACCTGGTGCAGCTG |       |
| PFCIRM123_09055    | ACATCGACGTCGTCGCTGGCGTGGACCCGGCGTCGGCATGTGGCGACCTGGTGCAGCTG |       |
| PFCIRM134_10180-   | ACATCGACGTCGTCGCTGGCGTGGACCCGGCGTCGGCATGTGGCGACCTGGTGCAGCTG |       |
| PFCIRM456_09555    | ACATCGACGTCGTCGCTGGCGTGGACCCGGCGTCGGCATGTGGCGACCTGGTGCAGCTG |       |
| PFCIRM508_01655    | ACATCGACGTCGTCGCTGGCGTGGACCCGGCGTCGGCATGTGGCGACCTGGTGCAGCTG |       |
| ITGP9_09195        | ACATCGACGTCGTCGCTGGCGTGGACCCGGCGTCGGCATGTGGCGACCTGGTGCAGCTG |       |
| PFCIRM9_06320      | ACATCGACGTCGTCGCTGGCGTGGACCCGGCGTCGGCATGTGGCGACCTGGTGCAGCTG |       |
| ITGP23_03080       | ACATCGACGTCGTCGCTGGCGTGGACCCGGCGTCGGCATGTGGCGACCTGGTGCAGCTG |       |
| PFCIRM527_10700    | ACATCGACGTCGTCGCTGGCGTGGACCCGGCGTCGGCATGTGGCGACCTGGTGCAGCTG |       |
| ITGP18_00520       | ACATCGACGTCGTCGCTGGCGTGGACCCGGCGTCGGCATGTGGCGACCTGGTGCAGCTG |       |
| CIRM1-PFREUD_04340 | ACATCGACGTCGTCGCTGGCGTGGACCCGGCGTCGGCATGTGGCGACCTGGTGCAGCTG |       |
| PFCIRM513_04955-   | ACATCGACGTCGTCGCTGGCGTGGACCCGGCGTCGGCATGTGGCGACCTGGTGCAGCTG |       |
| ITGP20_08925       | ACATCGACGTCGTCGCTGGCGTGGACCCGGCGTCGGCATGTGGCGACCTGGTGCAGCTG |       |
| PFCIRM512_02550    | ACATCGACGTCGTCGCTGGCGTGGACCCGGCGTCGGCATGTGGCGACCTGGTGCAGCTG |       |
| PFCIRM135_09305    | ACATCGACGTCGTCGCTGGCGTGGACCCGGCGTCGGCATGTGGCGACCTGGTGCAGCTG |       |
| PFCIRM122_07375    | ACATCGACGTCGTCGCTGGCGTGGACCCGGCGTCGGCATGTGGCGACCTGGTGCAGCTG |       |
| PFCIRM121_09415    | ACATCGACGTCGTCGCTGGCGTGGACCCGGCGTCGGCATGTGGCGACCTGGTGCAGCTG |       |
| PFCIRM119_12075    | ACATCGACGTCGTCGCTGGCGTGGACCCGGCGTCGGCATGTGGCGACCTGGTGCAGCTG |       |
| LSP108             | ACATCGACGTCGTCGCTGGCGTGGACCCGGCGTCGGCATGTGGCGACCTGGTGCAGCTG |       |
| CIRM514            | ACATCGACGTCGTCGCTGGCGTGGACCCGGCGTCGGCATGTGGCGACCTGGTGCAGCTG |       |
| PFCIRM516_06470    | ACATCGACGTCGTCGCTGGCGTGGACCCGGCGTCGGCATGTGGCGACCTGGTGCAGCTG |       |
| Clustal consensus  | *****                                                       | ***** |
|                    | 181                                                         | 240   |
| PFCIRM118_05600    | GCGCCGGTGTGAGTTCGACCACACGCCGACGGCAAGCAGATCACGCCGAAGCCACC    |       |
| PFCIRM123_09055    | GCGCCGGTGTGAGTTCGACCACACGCCGACGGCAAGCAGATCACGCCGAAGCCACC    |       |
| PFCIRM134_10180-   | GCGCCGGTGTGAGTTCGACCACACGCCGACGGCAAGCAGATCACGCCGAAGCCACC    |       |
| PFCIRM456_09555    | GCGCCGGTGTGAGTTCGACCACACGCCGACGGCAAGCAGATCACGCCGAAGCCACC    |       |
| PFCIRM508_01655    | GCGCCGGTGTGAGTTCGACCACACGCCGACGGCAAGCAGATCACGCCGAAGCCACC    |       |
| ITGP9_09195        | GCGCCGGTGTGAGTTCGACCACACGCCGACGGCAAGCAGATCACGCCGAAGCCACC    |       |
| PFCIRM9_06320      | GCGCCGGTGTGAGTTCGACCACACGCCGACGGCAAGCAGATCACGCCGAAGCCACC    |       |
| ITGP23_03080       | GCGCCGGTGTGAGTTCGACCACACGCCGACGGCAAGCAGATCACGCCGAAGCCACC    |       |
| PFCIRM527_10700    | GCGCCGGTGTGAGTTCGACCACACGCCGACGGCAAGCAGATCACGCCGAAGCCACC    |       |
| ITGP18_00520       | GCGCCGGTGTGAGTTCGACCACACGCCGACGGCAAGCAGATCACGCCGAAGCCACC    |       |
| CIRM1-PFREUD_04340 | GCGCCGGTGTGAGTTCGACCACACGCCGACGGCAAGCAGATCACGCCGAAGCCACC    |       |
| PFCIRM513_04955    | GCGCCGGTGTGAGTTCGACCACACGCCGACGGCAAGCAGATCACGCCGAAGCCACC    |       |
| ITGP20_08925       | GCGCCGGTGTGAGTTCGACCACACGCCGACGGCAAGCAGATCACGCCGAAGCCACC    |       |
| PFCIRM512_02550    | GCGCCGGTGTGAGTTCGACCACACGCCGACGGCAAGCAGATCACGCCGAAGCCACC    |       |
| PFCIRM135_09305    | GCGCCGGTGTGAGTTCGACCACACGCCGACGGCAAGCAGATCACGCCGAAGCCACC    |       |
| PFCIRM122_07375    | GCGCCGGTGTGAGTTCGACCACACGCCGACGGCAAGCAGATCACGCCGAAGCCACC    |       |
| PFCIRM121_09415    | GCGCCGGTGTGAGTTCGACCACACGCCGACGGCAAGCAGATCACGCCGAAGCCACC    |       |
| PFCIRM119_12075    | GCGCCGGTGTGAGTTCGACCACACGCCGACGGCAAGCAGATCACGCCGAAGCCACC    |       |
| LSP108             | GCGCCGGTGTGAGTTCGACCACACGCCGACGGCAAGCAGATCACGCCGAAGCCACC    |       |
| CIRM514            | GCGCCGGTGTGAGTTCGACCACACGCCGACGGCAAGCAGATCACGCCGAAGCCACC    |       |
| PFCIRM516_06470    | GCGCCGGTGTGAGTTCGACCACACGCCGACGGCAAGCAGATCACGCCGAAGCCACC    |       |
| Clustal consensus  | *****                                                       | ***** |
